# Supplementary material
Source: PubMed Central journal article supplement (PMC7035935)
Supplement: zii999092998s1.pdf [file zii999092998s1.pdf]

**Supplemental Table 1.** Meglumine antimoniate induced modulation of gene expression in skin lesion biopsies and PBMCs of CL patients.

| Gene   | <i>Biopsies</i> |                |              | <i>PBMCs</i> |                   |         |
|--------|-----------------|----------------|--------------|--------------|-------------------|---------|
|        | Fold Change     | 95% CI         | P value      | Fold Change  | 95% CI            | P value |
| BCL6   | 0.90            | ( 0.70, 1.11 ) | 0.618        | 1.02         | ( 0.89, 1.16 )    | 0.613   |
| C3     | 2.67            | ( 0.40, 4.99 ) | <b>0.029</b> | 1.20         | ( 0.68, 1.72 )    | 0.504   |
| C3AR1  | 0.77            | ( 0.39, 1.15 ) | 0.438        | 1.20         | ( 0.51, 1.90 )    | 0.376   |
| CCL11  | 1.84            | ( 0.90, 2.79 ) | 0.097        | 0.98         | ( 0.48, 1.49 )    | 0.900   |
| CCL13  | 1.46            | ( 0.38, 2.55 ) | 0.318        | 1.20         | ( 0.59, 1.81 )    | 0.602   |
| CCL16  | 1.89            | ( 0.89, 2.89 ) | 0.073        | 1.01         | ( 0.50, 1.52 )    | 0.711   |
| CCL17  | 1.78            | ( 0.76, 2.81 ) | 0.085        | 1.30         | ( 0.61, 2.00 )    | 0.176   |
| CCL19  | 0.73            | ( 0.04, 1.41 ) | 0.548        | 0.80         | ( 0.26, 1.36 )    | 0.501   |
| CCL2   | 0.48            | ( 0.09, 0.88 ) | <b>0.033</b> | 1.00         | ( 0.57, 1.43 )    | 0.858   |
| CCL21  | 0.75            | ( 0.30, 1.20 ) | 0.385        | 1.02         | ( 0.49, 1.55 )    | 0.772   |
| CCL22  | 0.88            | ( 0.38, 1.38 ) | 0.570        | 1.02         | ( 0.51, 1.54 )    | 0.735   |
| CCL23  | 1.80            | ( 1.02, 2.57 ) | <b>0.023</b> | 1.12         | ( 0.52, 1.72 )    | 0.658   |
| CCL24  | 2.38            | ( 0.96, 3.80 ) | 0.096        | 0.88         | ( 0.39, 1.37 )    | 0.688   |
| CCL3   | 0.48            | ( 0.18, 0.78 ) | <b>0.021</b> | 0.66         | ( 0.37, 0.96 )    | 0.094   |
| CCL4   | 0.45            | ( 0.13, 0.77 ) | <b>0.006</b> | 0.66         | ( 0.29, 1.05 )    | 0.136   |
| CCL5   | 0.65            | ( 0.19, 1.11 ) | 0.406        | 0.95         | ( 0.60, 1.31 )    | 0.922   |
| CCL7   | 0.39            | ( 0.16, 0.63 ) | <b>0.026</b> | 0.95         | ( 0.44, 1.47 )    | 0.980   |
| CCL8   | 1.60            | ( 0.66, 2.54 ) | 0.145        | 0.9          | ( 0.37, 1.43 )    | 0.667   |
| CCR1   | 0.57            | ( 0.31, 0.82 ) | 0.073        | 0.10         | ( 0.66, 1.32 )    | 0.952   |
| CCR2   | 0.83            | ( 0.50, 1.17 ) | 0.391        | 1.02         | ( 0.63, 1.43 )    | 0.939   |
| CCR3   | 1.50            | ( 0.66, 2.29 ) | 0.146        | 1.01         | ( 0.08, 1.94 )    | 0.862   |
| CCR4   | 1.34            | ( 0.73, 1.96 ) | 0.129        | 1.19         | ( 0.82, 1.57 )    | 0.321   |
| CCR7   | 0.73            | ( 0.21, 1.26 ) | 0.632        | 1.03         | ( 0.83, 1.24 )    | 0.774   |
| CD14   | 0.51            | ( 0.23, 0.79 ) | 0.186        | 2.16         | ( 0.56, 3.77 )    | 0.074   |
| CD40   | 0.60            | ( 0.39, 0.83 ) | <b>0.019</b> | 0.84         | ( 0.48, 1.20 )    | 0.481   |
| CD40LG | 1.38            | ( 0.82, 1.94 ) | 0.099        | 0.83         | ( 0.60, 1.07 )    | 0.199   |
| CEBPB  | 0.68            | ( 0.48, 0.89 ) | <b>0.024</b> | 1.11         | ( 0.74, 1.49 )    | 0.386   |
| CRP    | 1.60            | ( 0.66, 2.54 ) | 0.145        | 1.01         | ( 0.50, 1.52 )    | 0.711   |
| CSF1   | 0.93            | ( 0.60, 1.26 ) | 0.754        | 0.76         | ( 0.26, 1.27 )    | 0.406   |
| CXCL1  | 0.25            | ( 0.04, 0.46 ) | 0.379        | 1.07         | ( 0.27, 1.89 )    | 0.446   |
| CXCL10 | 0.08            | ( 0.03, 0.12 ) | <b>0.000</b> | 0.58         | ( 0.00001, 1.31 ) | 0.397   |
| CXCL2  | 0.39            | ( 0.10, 0.67 ) | 0.475        | 1.07         | ( 0.41, 1.74 )    | 0.564   |
| CXCL3  | 0.80            | ( 0.41, 1.20 ) | 0.478        | 1.09         | ( 0.55, 1.64 )    | 0.603   |
| CXCL5  | 0.82            | ( 0.27, 1.37 ) | 0.517        | 1.34         | ( 0.40, 2.28 )    | 0.450   |
| CXCL6  | 1.21            | ( 0.56, 1.87 ) | 0.256        | 1.43         | ( 0.23, 2.65 )    | 0.462   |
| CXCL9  | 0.17            | ( 0.05, 0.29 ) | <b>0.000</b> | 0.54         | ( 0.04, 1.05 )    | 0.252   |
| CXCR1  | 1.35            | ( 0.68, 2.04 ) | 0.500        | 0.98         | ( 0.51, 1.47 )    | 0.733   |
| CXCR2  | 0.71            | ( 0.41, 1.03 ) | 0.815        | 1.19         | ( 0.43, 1.96 )    | 0.887   |
| CXCR4  | 0.74            | ( 0.28, 1.20 ) | 0.492        | 1.05         | ( 0.75, 1.36 )    | 0.900   |
| FASLG  | 0.58            | ( 0.26, 0.90 ) | 0.061        | 0.79         | ( 0.49, 1.09 )    | 0.237   |
| FOS    | 0.84            | ( 0.18, 1.50 ) | 0.384        | 0.84         | ( 0.45, 1.24 )    | 0.564   |
| IFNG   | 0.28            | ( 0.09, 0.48 ) | <b>0.000</b> | 0.38         | ( 0.00001, 0.83 ) | 0.207   |
| IL10   | 0.64            | ( 0.25, 1.03 ) | 0.292        | 1.15         | ( 0.78, 1.53 )    | 0.445   |
| IL10RB | 1.06            | ( 0.88, 1.24 ) | 0.397        | 1.08         | ( 0.88, 1.28 )    | 0.440   |
| IL15   | 0.82            | ( 0.49, 1.15 ) | 0.760        | 0.83         | ( 0.55, 1.12 )    | 0.345   |
| IL17A  | 1.52            | ( 0.63, 2.42 ) | 0.167        | 1.01         | ( 0.50, 1.52 )    | 0.711   |
| IL18   | 1.08            | ( 0.73, 1.44 ) | 0.354        | 1.51         | ( 1.04, 1.99 )    | 0.015   |
| IL1A   | 0.74            | ( 0.23, 1.26 ) | 0.867        | 0.81         | ( 0.16, 1.48 )    | 0.649   |
| IL1B   | 0.18            | ( 0.01, 0.35 ) | 0.484        | 0.81         | ( 0.16, 1.48 )    | 0.563   |
| IL1R1  | 1.57            | ( 1.20, 1.95 ) | <b>0.000</b> | 1.42         | ( 0.66, 2.19 )    | 0.367   |
| IL1RAP | 0.83            | ( 0.55, 1.12 ) | 0.537        | 0.91         | ( 0.75, 1.07 )    | 0.418   |
| IL1RN  | 0.49            | ( 0.19, 0.79 ) | 0.701        | 0.83         | ( 0.58, 1.09 )    | 0.316   |
| IL22   | 1.33            | ( 0.62, 2.05 ) | 0.147        | 0.53         | ( 0.00001, 1.10 ) | 0.307   |
| IL23A  | 1.06            | ( 0.64, 1.49 ) | 0.421        | 0.97         | ( 0.75, 1.20 )    | 0.768   |
| IL23R  | 1.40            | ( 0.62, 2.18 ) | 0.178        | 0.88         | ( 0.42, 1.36 )    | 0.718   |
| IL5    | 1.67            | ( 0.81, 2.53 ) | 0.088        | 0.76         | ( 0.24, 1.28 )    | 0.130   |
| IL6    | 0.28            | ( 0.05, 0.53 ) | <b>0.050</b> | 0.98         | ( 0.00001, 1.61 ) | 0.918   |
| IL6R   | 0.79            | ( 0.50, 1.10 ) | 0.526        | 0.98         | ( 0.65, 1.31 )    | 0.905   |

|         |      |                   |              |      |                   |       |
|---------|------|-------------------|--------------|------|-------------------|-------|
| CXCL8   | 0.21 | ( 0.00001, 0.47 ) | 0.533        | 0.89 | ( 0.43, 1.37 )    | 0.984 |
| IL9     | 1.59 | ( 0.66, 2.54 )    | 0.145        | 0.55 | ( 0.00001, 1.12 ) | 0.185 |
| ITGB2   | 0.73 | ( 0.20, 1.26 )    | 0.995        | 1.02 | ( 0.68, 1.38 )    | 0.922 |
| KNG1    | 1.60 | ( 0.66, 2.54 )    | 0.145        | 1.01 | ( 0.50, 1.52 )    | 0.711 |
| LTA     | 1.20 | ( 0.60, 1.82 )    | 0.229        | 0.70 | ( 0.44, 0.97 )    | 0.111 |
| LTB     | 0.85 | ( 0.28, 1.44 )    | 0.455        | 0.98 | ( 0.70, 1.26 )    | 0.919 |
| LY96    | 1.07 | ( 0.64, 1.50 )    | 0.571        | 1.07 | ( 0.86, 1.30 )    | 0.567 |
| MYD88   | 0.7  | ( 0.55, 0.85 )    | <b>0.004</b> | 1.03 | ( 0.79, 1.29 )    | 0.805 |
| NFKB1   | 0.85 | ( 0.73, 0.99 )    | 0.065        | 0.96 | ( 0.79, 1.13 )    | 0.574 |
| NOS2    | 1.53 | ( 0.65, 2.42 )    | 0.142        | 1.00 | ( 0.49, 1.51 )    | 0.786 |
| NR3C1   | 1.31 | ( 1.06, 1.58 )    | <b>0.007</b> | 1.02 | ( 0.86, 1.19 )    | 0.822 |
| PTGS2   | 0.48 | ( 0.15, 0.82 )    | 0.802        | 0.70 | ( 0.23, 1.18 )    | 0.617 |
| RIPK2   | 0.93 | ( 0.63, 1.24 )    | 0.845        | 0.88 | ( 0.64, 1.13 )    | 0.443 |
| SELE    | 0.80 | ( 0.34, 1.25 )    | 0.455        | 0.96 | ( 0.42, 1.51 )    | 0.795 |
| TIRAP   | 1.45 | ( 1.06, 1.85 )    | <b>0.030</b> | 1.01 | ( 0.75, 1.29 )    | 0.933 |
| TLR1    | 0.99 | ( 0.64, 1.36 )    | 0.825        | 0.90 | ( 0.71, 1.10 )    | 0.283 |
| TLR2    | 0.52 | ( 0.30, 0.75 )    | <b>0.027</b> | 0.93 | ( 0.63, 1.24 )    | 0.951 |
| TLR3    | 0.91 | ( 0.72, 1.10 )    | 0.521        | 0.86 | ( 0.58, 1.14 )    | 0.531 |
| TLR4    | 1.02 | ( 0.58, 1.48 )    | 0.587        | 1.22 | ( 0.78, 1.67 )    | 0.510 |
| TLR5    | 1.60 | ( 1.05, 2.17 )    | <b>0.023</b> | 1.37 | ( 0.93, 1.81 )    | 0.176 |
| TLR6    | 1.34 | ( 0.72, 1.97 )    | 0.112        | 1.08 | ( 0.58, 1.59 )    | 0.923 |
| TLR7    | 0.98 | ( 0.58, 1.39 )    | 0.551        | 0.84 | ( 0.51, 1.19 )    | 0.543 |
| TLR9    | 1.59 | ( 0.66, 2.54 )    | 0.145        | 1.03 | ( 0.69, 1.37 )    | 0.779 |
| TNF     | 0.65 | ( 0.36, 0.95 )    | 0.270        | 0.66 | ( 0.37, 0.95 )    | 0.057 |
| TNFSF14 | 1.36 | ( 0.69, 2.03 )    | 0.182        | 0.89 | ( 0.55, 1.23 )    | 0.631 |
| TOLLIP  | 1.05 | ( 0.76, 1.34 )    | 0.182        | 1.01 | ( 0.71, 1.32 )    | 0.990 |

The p values are calculated based on a Student's t-test of the replicate  $2^{(-\Delta\Delta CT)}$  values for each gene in the control group and treatment groups, and p values less than 0.05 are considered significant. PCR Array Code: Inflammatory response and Autoimmunity PAHS-077Z-Qiagen.

**Supplemental Table 2. Socio-demographic characteristics of participants included in the cohort for SNPs analysis.**

| <b>Characteristic</b>                                               | <b>Total</b>    | <b>Cure</b>     | <b>Treatment Failure</b> | <b>p</b>          |
|---------------------------------------------------------------------|-----------------|-----------------|--------------------------|-------------------|
| Number of patients. No. (%)                                         | 40 (100)        | 20 (50)         | 20 (50)                  | -                 |
| Sex , No. (%)                                                       |                 |                 |                          |                   |
| Male                                                                | 34 (85)         | 17 (85)         | 17 (85)                  | 1.00*             |
| Female                                                              | 6 (15)          | 3 (15)          | 3 (15)                   |                   |
| Age, median (SD), years.                                            | 31 (8.9)        | 32.6 (8.7)      | 30.9 (9.2)               | 0.56 <sup>+</sup> |
| Ethnicity, No. (%)                                                  |                 |                 |                          |                   |
| Afrocolombian                                                       | 28 (70)         | 14 (70)         | 14 (70)                  | 1.00*             |
| Other                                                               | 12 (30)         | 6 (30)          | 6 (30)                   |                   |
| Weight, median (SD), Kg                                             | 72.4 (9.7)      | 71.6 (11.2)     | 73.2 (8.2)               | 0.60 <sup>+</sup> |
| Time of lesion evolution, median (IR), months.                      | 1 (1 – 2)       | 2 (1 – 2.5)     | 1 (1 – 2)                | 0.19 <sup>+</sup> |
| Number of lesions per patient, median (IR), No.                     | 2 (1 – 2)       | 2 (1 – 2-5)     | 1.5 (1 – 2)              | 0.59 <sup>+</sup> |
| Prior episodes of CL, No. (%)                                       |                 |                 |                          |                   |
| Yes                                                                 | 2 (5)           | 0 (0)           | 2 (5)                    | 0.48*             |
| No                                                                  | 38 (95)         | 20 (100)        | 18 (95)                  |                   |
| Adherence to treatment, median (IR), % received/formulated ampulles | 100 (100 – 100) | 100 (100 – 100) | 100 (100 – 100)          | 0.26 <sup>+</sup> |
| * Chi2/Fisher<br>+ T-test/Wilcoxon sum rank.                        |                 |                 |                          |                   |

## Supplemental Figure 1

**A**

| <b>N=60</b>                                          | <b>Number of participants contributing samples for each experimental approach</b> |
|------------------------------------------------------|-----------------------------------------------------------------------------------|
| <b>Paired pre and post-treatment PBMCs</b>           | <b>n= 23</b><br>(Gene expression PCR arrays n=14 and Luminex n=16)                |
| <b>Pre-treatment PBMCs</b>                           | <b>n=40</b><br>(Pharmacogenomics - PGx)                                           |
| <b>Paired pre and post-treatment lesion biopsies</b> | <b>n=16</b><br>(Gene expression PCR arrays)                                       |

**B**

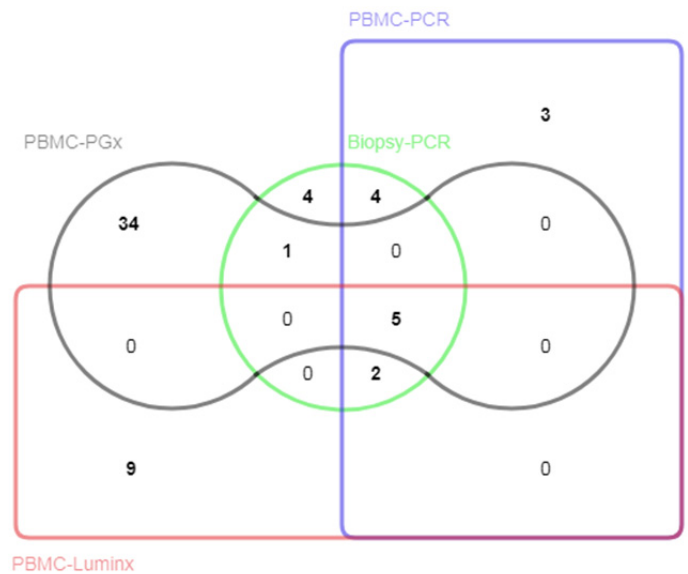

**Supplementary Figure 1. Schematic representation of total numbers of participants and samples for each experimental approach. (A)** A total of 60 patients participated in this study. The sample size for each sample type and experimental procedures are shown. **(B)** The Venn diagram represents the distribution of patients contributing samples for each experimental approach. Intersections show number of patients who contributed samples for more than one experimental approach. PBMC-PCR (PBMCs used for PCR arrays); PBMC-PGx (PBMCs used for screening of CCL2 polymorphisms); PBMC-Luminex (PBMCs used for protein measurement using Luminex); Biopsy-PCR (Lesion biopsy samples used for PCR arrays).

## Supplemental Figure 2

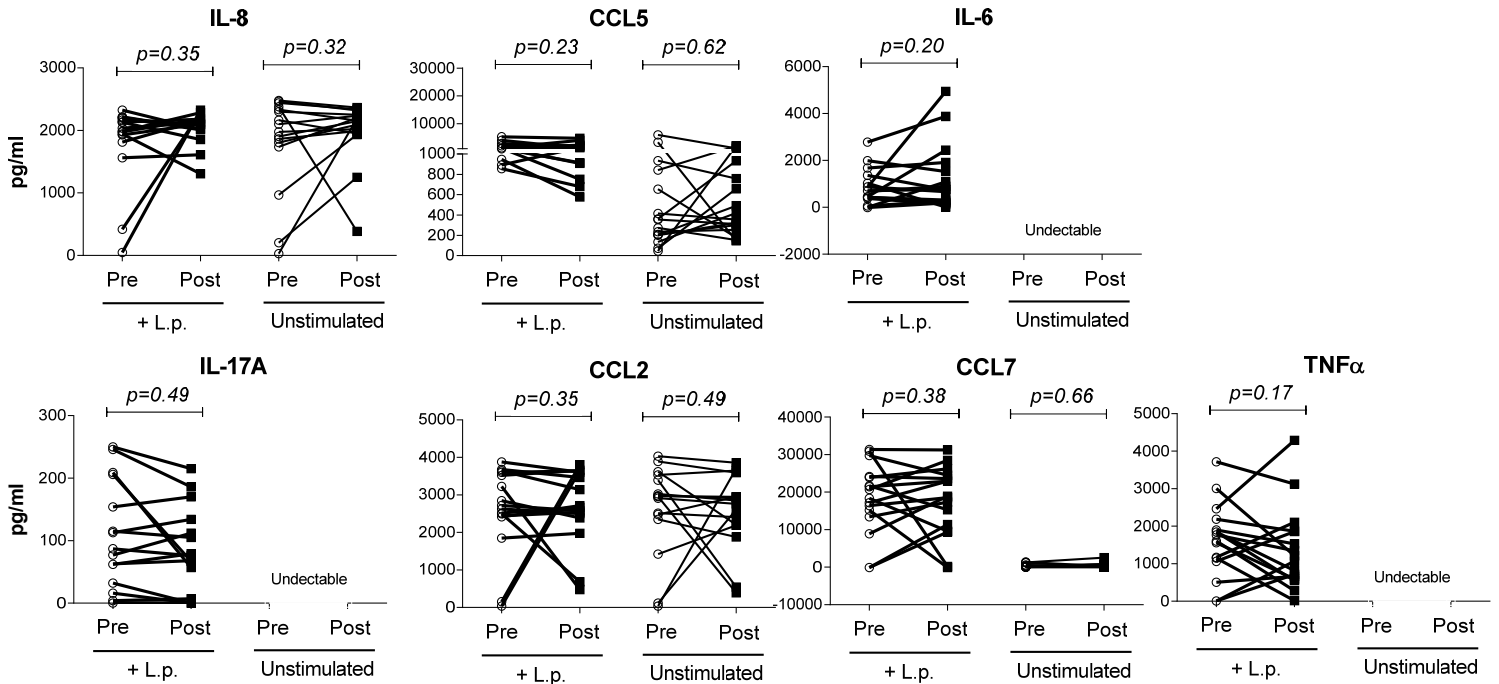

**Supplemental Figure 2. Protein measurement in PBMCs obtained pre-treatment and post-treatment.** Secreted protein levels were measured in a Luminex 200 instrument, from culture supernatants of PBMCs from CL patients (n=16) collected before and at the end of treatment, and re-exposed to *L. V panamensis* promastigotes. Median fluorescence intensity data were analyzed and data expressed in pg/mL. P values were calculated using a Wilcoxon matched-pair signed rank test or Paired t test depending on the distribution of the data.
